# Supplementary material for: Identification of proliferative progenitors associated with prominent postnatal growth of the pons
Source: PubMed Central journal article supplement (PMC4873968; doi:10.1038/ncomms11628), 2016-05-18
Supplement: ncomms11628-s1.pdf [file ncomms11628-s1.pdf]

| Strain             | Type of allele       | Purpose                                                                               | Source                                     | Citation for allele                           |
|--------------------|----------------------|---------------------------------------------------------------------------------------|--------------------------------------------|-----------------------------------------------|
| <i>Ai14</i>        | Conditional reporter | TdTomato labeling of Cre-recombined cells and progeny (using viral or hereditary Cre) | Jackson Lab                                | Madisen <i>et al.</i> , 2010 (PMID: 20023653) |
| <i>ALDH1L1:GFP</i> | BAC transgenic       | Labeling of astrocytes                                                                | MMRRC/GENSAT                               | Cahoy <i>et al.</i> , 2008 (PMID: 18171944)   |
| <i>FoxA2CreER</i>  | Knock-in             | Fate-mapping of midline cells                                                         | Ross Metzger, UCSF                         | Park <i>et al.</i> , 2008 (PMID: 18161057)    |
| <i>Gli1CreER</i>   | BAC transgenic       | Fate-mapping of Gli1 <sup>+</sup> cells                                               | Alexandra Joyner, Memorial Sloan-Kettering | Ahn and Joyner, 2004 (PMID: 15315762)         |
| <i>Nestin:Tva</i>  | Transgene            | RCAS retroviral fatemapping of VZ progenitors                                         | Jackson Lab                                | Holland <i>et al.</i> , 1998 (PMID: 9851974)  |
| <i>NG2:DsRed</i>   | BAC transgenic       | Labeling of NG2 <sup>+</sup> cells (OLPs and pericytes)                               | Lily Jan, UCSF                             | Ziskin <i>et al.</i> , 2007 (PMID: 17293857)  |
| <i>NG2CreER</i>    | BAC transgenic       | Fate-mapping of NG2 <sup>+</sup> cells                                                | Jackson Lab                                | Zhu <i>et al.</i> , 2011 (PMID: 21266410)     |
| <i>Sox2:GFP</i>    | Knock-in             | Labeling of Sox2 <sup>+</sup> cells                                                   | Jackson Lab                                | Arnold <i>et al.</i> , 2011 (PMID: 21982232)  |
| <i>Sox2CreER</i>   | Knock-in             | Fate-mapping of Sox2 <sup>+</sup> cells                                               | Jackson Lab                                | Arnold <i>et al.</i> , 2011 (PMID: 21982232)  |

**Supplementary Figure 1. List of transgenic mouse strains.** Transgenes used in this study are listed alphabetically, along with the type of allele, their experimental purpose, the source from which they were obtained for this study, and the papers in which the transgenes were originally described.

| Antigen                                            | Host and Isotype | Clone ID      | Dilution | Immunogen                                                                                                                                       | Vendor                                                          | Catalog number |
|----------------------------------------------------|------------------|---------------|----------|-------------------------------------------------------------------------------------------------------------------------------------------------|-----------------------------------------------------------------|----------------|
| APC (Adenomatous Polyposis Coli)                   | Mouse IgG2b      | Clone CC-1    | 1:500    | Recombinant protein consisting of amino acids 1-226 of APC                                                                                      | EMD Millipore, Billerica, MA                                    | OP80           |
| BrdU (Bromodeoxyuridine)                           | Rat IgG          | Clone BU1/75  | 1:600    | Chemical BrdU                                                                                                                                   | Novus Biologicals, Littleton, CO                                | NB500-169      |
| Cleaved caspase-3                                  | Rabbit IgG       | Polyclonal    | 1:1000   | Synthetic peptide corresponding to amino-terminal residues adjacent to Asp175 in human caspase-3                                                | Cell Signaling Technology, Danvers, MA                          | 9661           |
| Doublecortin                                       | Rabbit IgG       | Polyclonal    | 1:400    | Synthetic peptide corresponding to human doublecortin                                                                                           | Cell Signaling Technology, Danvers, MA                          | 4604           |
| GFAP (Glial Fibrillary Acidic Protein)             | Rabbit IgG       | Polyclonal    | 1:500    | GFAP isolated from cow spinal cord                                                                                                              | Dako, Carpinteria, CA                                           | Z0334          |
| GFAP (Glial Fibrillary Acidic Protein)             | Mouse IgG1       | Clone GA5     | 1:1000   | Purified glial filament                                                                                                                         | EMD Millipore, Billerica, MA                                    | MAB3402        |
| GFAP (Glial Fibrillary Acidic Protein)             | Chicken IgY      | Polyclonal    | 1:500    | Full length bovine GFAP (purified from a Triton X-100 extract of myelin associated material by centrifugation and chromatography)               | Abcam, Cambridge, MA                                            | ab4674         |
| GFP (Green Fluorescent Protein)                    | Rabbit IgG       | Polyclonal    | 1:1000   | Highly purified recombinant full length GFP made in Escherichia coli                                                                            | Abcam, Cambridge, MA                                            | ab6556         |
| GFP (Green Fluorescent Protein)                    | Chicken IgY      | Polyclonal    | 1:1000   | Purified recombinant green fluorescent protein (GFP)                                                                                            | Aves Lab, Tigard, OR                                            | GFP1020        |
| Ki67                                               | Mouse IgG1       | Clone B56     | 1:400    | Human Ki-67                                                                                                                                     | BD Pharmingen, San Diego, CA                                    | 556003         |
| MBP (Myelin Basic Protein)                         | Rat IgG          | Clone 12      | 1:200    | Intact MBP                                                                                                                                      | ABD Serotec, Raleigh, NC                                        | MCA4095        |
| Nestin                                             | Mouse IgG1       | Clone Rat-401 | 1:750    | Nestin purified from embryonic rat spinal cord                                                                                                  | EMD Millipore, Billerica, MA                                    | MAB353         |
| Nestin                                             | Chicken IgY      | Polyclonal    | 1:100    | Peptide corresponding to a region of the Nestin gene product shared between the rat (AAA41119, NCBI) and human (NP_001966, NCBI) gene products. | Lifespan Biosciences, Seattle, WA                               | LS-C73310      |
| NeuN (Neuronal Nuclei)                             | Mouse IgG1       | Clone A60     | 1:200    | Purified cell nuclei from mouse brain                                                                                                           | EMD Millipore, Billerica, MA                                    | MAB377         |
| NG2                                                | Rabbit IgG       | Polyclonal    | 1:200    | Immunoaffinity purified NG2 Chondroitin Sulfate Proteoglycan from rat                                                                           | EMD Millipore, Billerica, MA                                    | AB5320         |
| Olig2                                              | Rabbit IgG       | Polyclonal    | 1:10000  | Fusion protein containing N-terminus of mouse Olig2                                                                                             | Gift of C. Stiles, Dana-Farber Cancer Institute                 | N/A            |
| Olig2                                              | Mouse IgG2a      | Clone 211F1.1 | 1:750    | Fusion protein containing N-terminus of mouse Olig2                                                                                             | Gift of C. Stiles, Dana-Farber Cancer Institute                 | N/A            |
| PDGFRalpha                                         | Rabbit IgG       | Clone D1E1E   | 1:500    | Synthetic peptide corresponding to residues near the carboxy-terminal sequence of human PDGFRalpha                                              | Cell Signaling Technology, Danvers, MA                          | 3174           |
| PDGFRalpha                                         | Rabbit IgG       | Polyclonal    | 1:1000   | Affinity purified recombinant ectodomain of human PDGFRalpha                                                                                    | Gift of W. Stallcup, Sanford-Burnham Medical Research Institute | N/A            |
| phospho-ser10-Histone H3                           | Rabbit IgG       | Polyclonal    | 1:1000   | Linear peptide corresponding to human Histone H3 at Ser10.                                                                                      | EMD Millipore, Billerica, MA                                    | 06-570         |
| phospho-ser55-Vimentin                             | Mouse IgG2b      | Clone 4A4     | 1:500    | Synthetic MPV55 phosphopeptide corresponding to Mouse phosphorylated vimentin Ser55 (SLYSS-phosphoS55-PGGAYC-KLH)                               | MBL International, Woburn, MA                                   | D076-3         |
| PSA-NCAM                                           | Mouse IgM        | Clone 2-2B    | 1:500    | Viable Meningococcus group B (strain 355)                                                                                                       | EMD Millipore, Billerica, MA                                    | MAB5324        |
| RFP (Red Fluorescent Proteins, including TdTomato) | Rat IgG          | Clone 5F8     | 1:1000   | Immunogen not specified, but tested on monomeric RFPs                                                                                           | ChromoTek, Planegg-Martinsried, Germany                         | 5f8            |
| RFPs (DsRed and TdTomato)                          | Rabbit IgG       | Polyclonal    | 1:1000   | DsRed-Express protein                                                                                                                           | Clontech, Mountain View, CA                                     | 632496         |
| S100                                               | Rabbit IgG       | Polyclonal    | 1:500    | S100 isolated from cow brain                                                                                                                    | Dako, Carpinteria, CA                                           | Z033           |
| Sox10                                              | Goat IgG         | Polyclonal    | 1:100    | Peptide mapping at the N-terminus of Sox-10 of human origin                                                                                     | Santa Cruz Biotechnology, Dallas, TX                            | sc-17342       |
| Sox2                                               | Goat IgG         | Polyclonal    | 1:250    | Peptide mapping near the C-terminus of Sox-2 of human origin                                                                                    | Santa Cruz Biotechnology, Dallas, TX                            | sc-17320       |
| Vimentin                                           | Mouse IgM        | Clone LN-6    | 1:200    | Human thymic nuclear extract                                                                                                                    | Sigma-Aldrich, St. Louis, MO                                    | V2258          |

**Supplementary Figure 2. List of primary antibodies for immunohistochemistry.** Primary antibodies were used at the indicated dilutions. Where available, multiple antibodies were used to validate antibody specificity. Immunogen information is provided by the vendor.

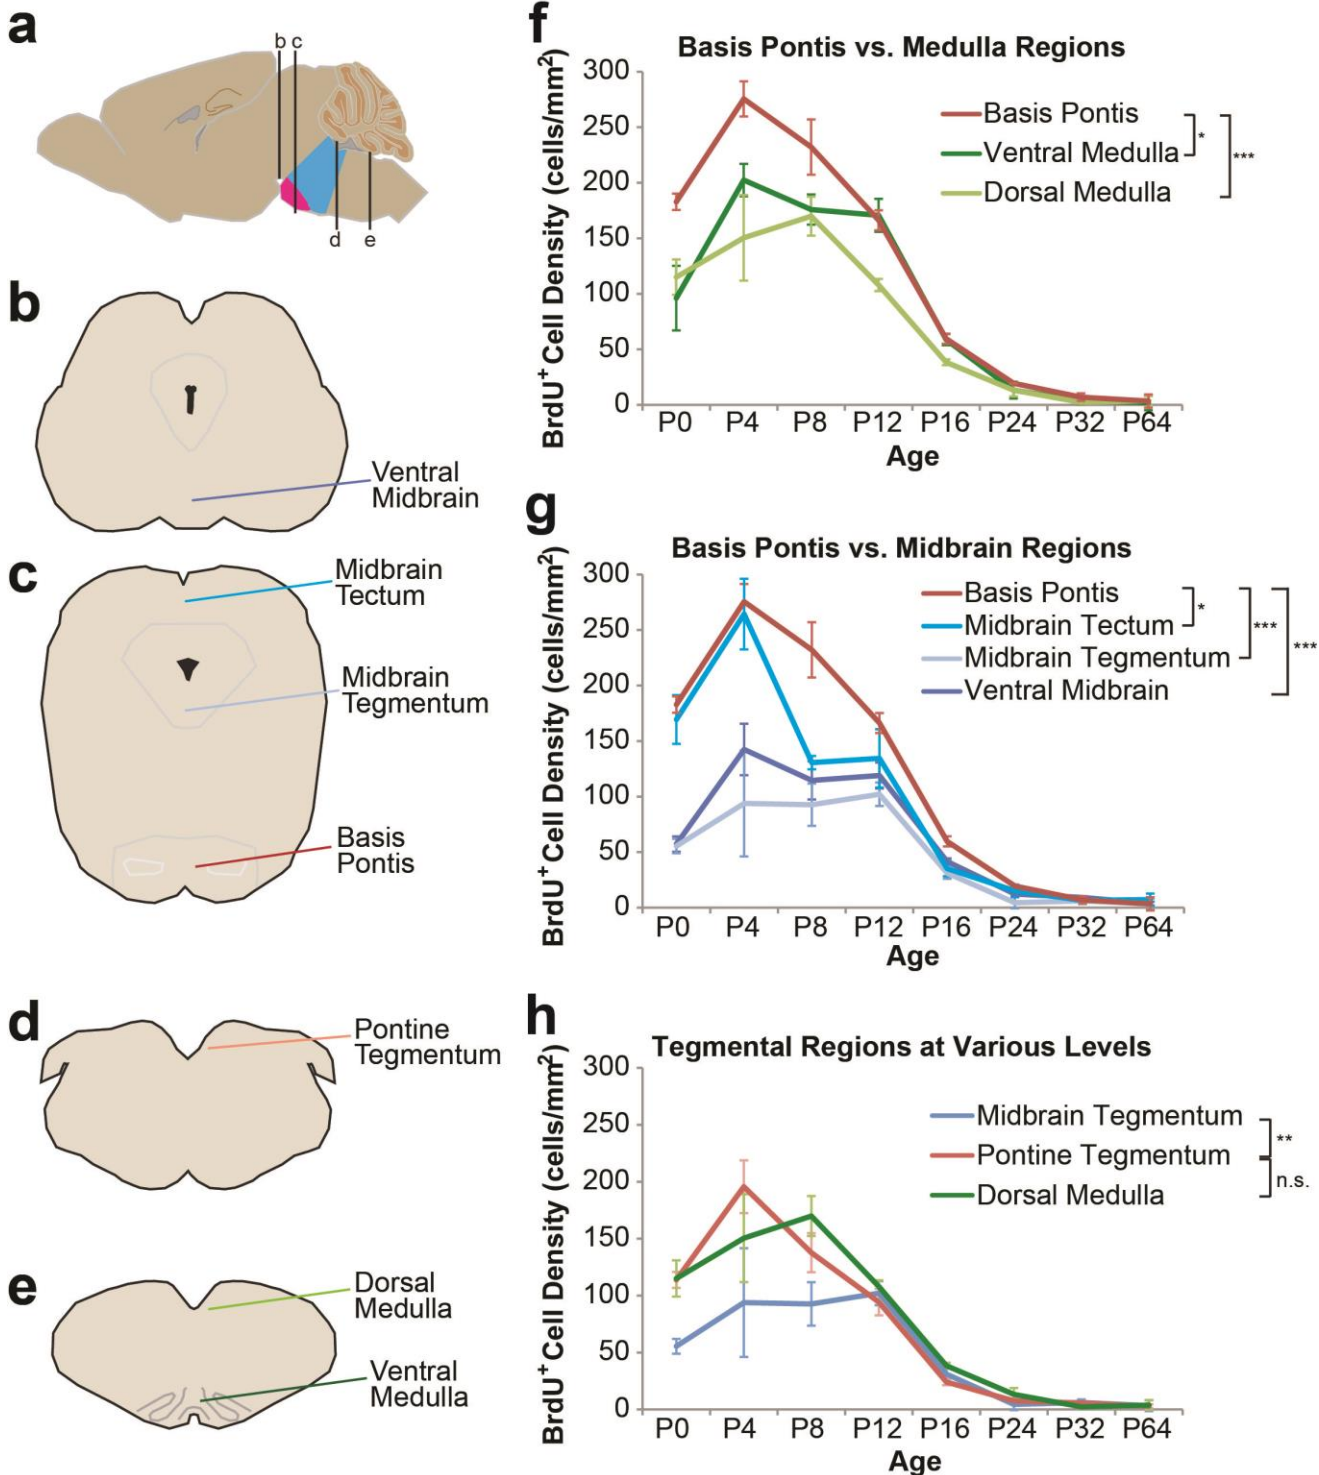

**Supplementary Figure 3. Basis Pontis is the most proliferative region of postnatal brainstem.**

CD1 wild type mice received a single dose of BrdU 100 min before perfusion. Immunofluorescent BrdU staining was detected by confocal microscopy. Proliferation density was computed as number of BrdU<sup>+</sup> nuclei divided by tissue area. All data points represent mean  $\pm$  SEM of  $n = 3$  mice;  $P$ -values based on 2-way ANOVA and Bonferroni *post hoc* adjustment. \*  $P < 0.05$ ; \*\*  $P < 0.01$ ; \*\*\*  $P < 0.001$ ; n.s.  $P > 0.05$ . **(a-e)** Sections in the coronal plane illustrate the levels of brainstem represented in (f-h). **(f)** Basis pontis is more proliferative than both ventral medulla ( $F_{1,32}=11.53$ ,  $P = 0.0108$ ) and dorsal medulla ( $F_{1,32}=25.14$ ,  $P < 0.0006$ ). **(g)** Basis pontis is more proliferative than ventral midbrain ( $F_{1,32}=78.16$ ,  $P < 0.0006$ ), midbrain tegmentum ( $F_{1,32}=122.34$ ,  $P < 0.0006$ ), and midbrain tectum ( $F_{1,32}=8.87$ ,  $P = 0.0330$ ). **(h)** Pontine tegmentum is more proliferative than midbrain tegmentum ( $F_{1,32}=11.86$ ,  $P = 0.0032$ ), but not dorsal medulla ( $F_{1,32}=0.07$ ,  $P = 0.7918$ ).



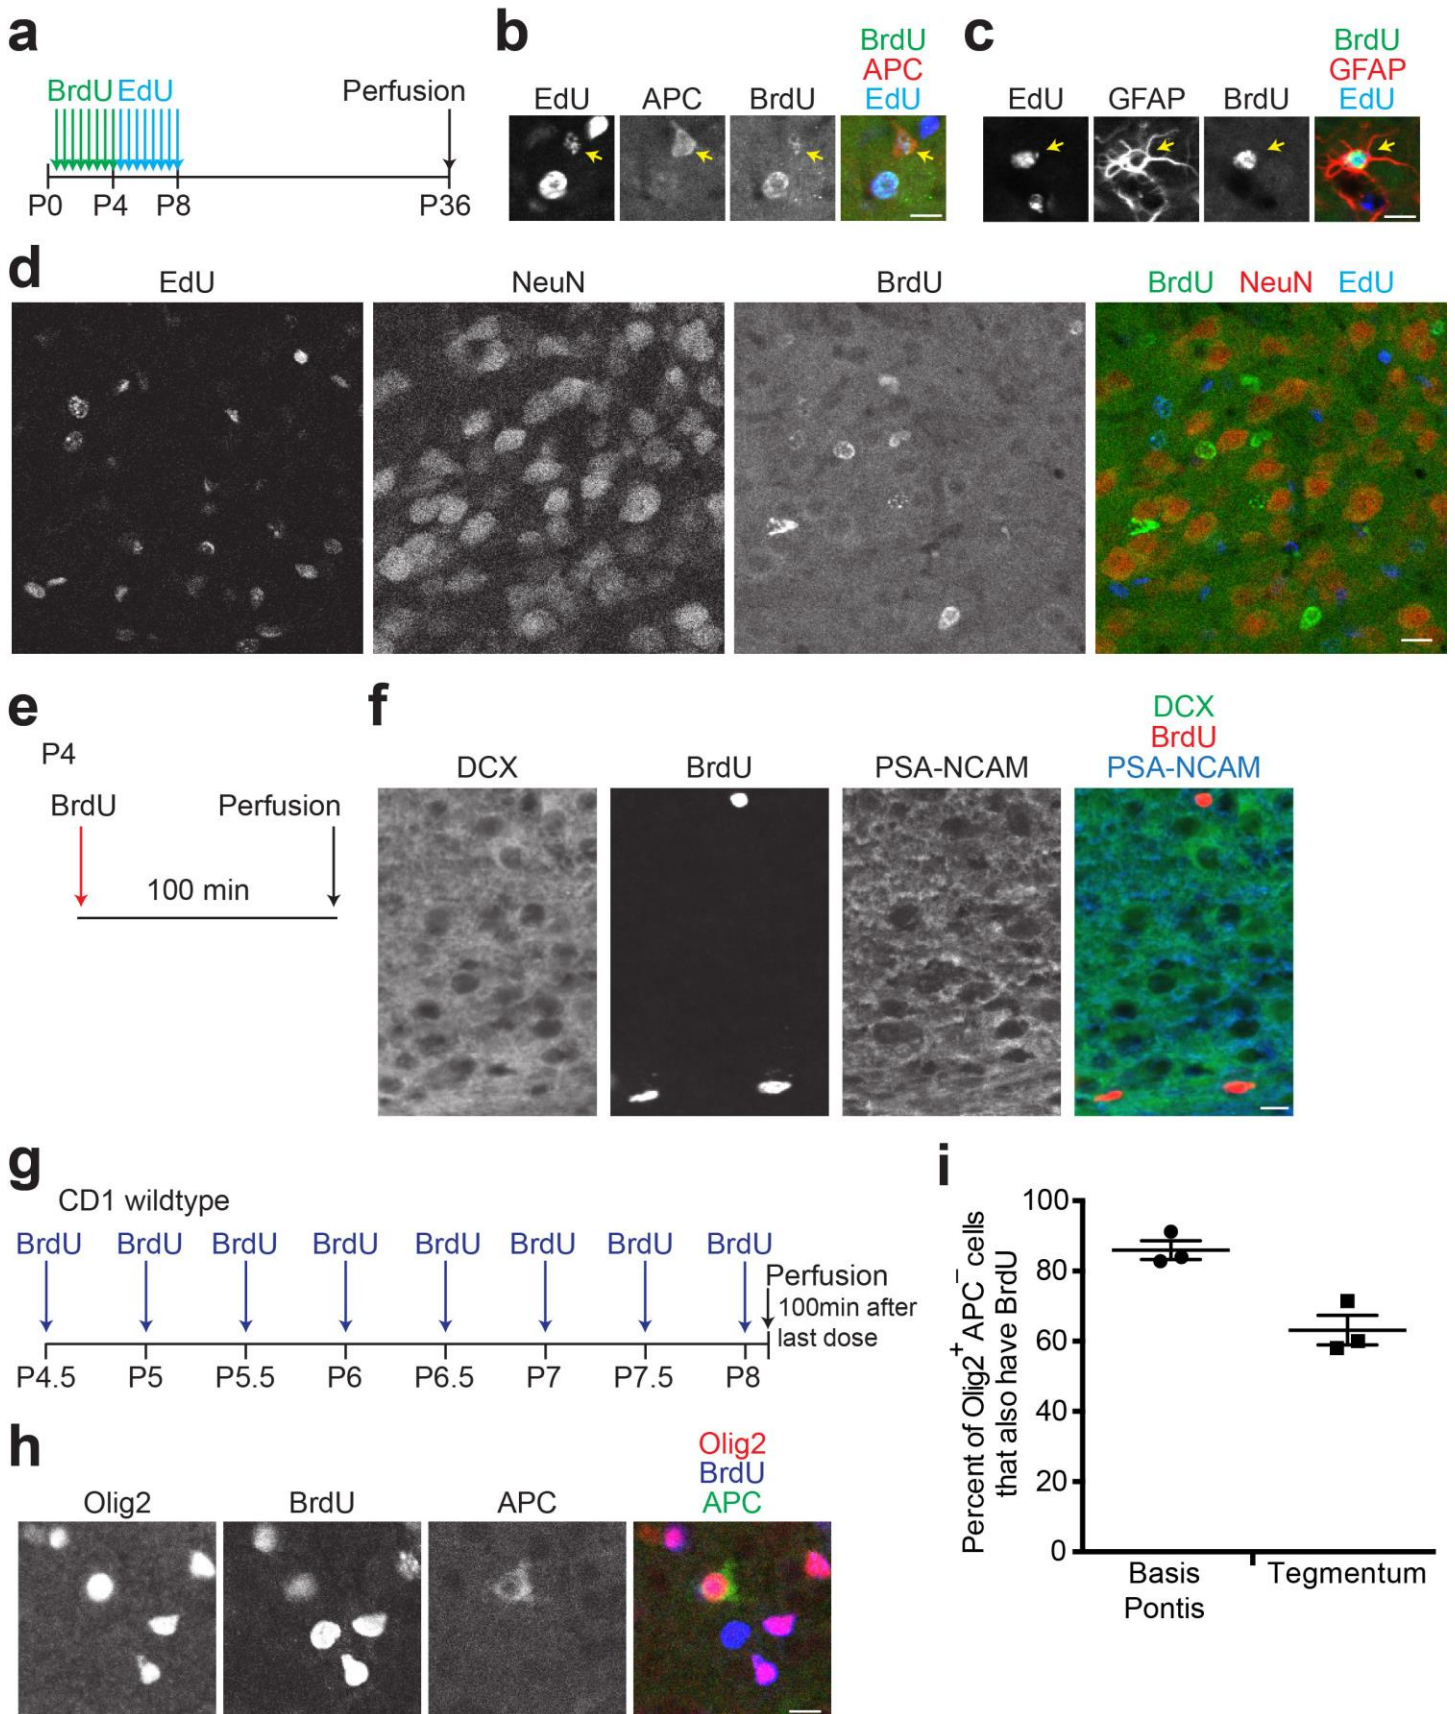

**Supplementary Figure 4. Postnatal pontine proliferation is non-neurogenic.** (a) CD1 wild type mice were given BrdU at 50mg/kg every 12 hrs from P0.5 through P4, then EdU at an equimolar dose (41 mg/kg) every 12 hrs from P4.5 through P8, and perfused 28 days following treatment. (b-c) Pons tissue from mice prepared as in (a) was stained for the indicated markers; BrdU<sup>+</sup>EdU<sup>+</sup> cells in basis pontis included APC<sup>+</sup> oligodendrocytes and BrdU<sup>+</sup>EdU<sup>+</sup>GFAP<sup>+</sup> astrocytes.

Scale bars = 10  $\mu\text{m}$ . **(d)** Pons tissue from mice prepared as in (a) was co-stained for BrdU, EdU, and NeuN, but no NeuN<sup>+</sup>BrdU<sup>+</sup> or NeuN<sup>+</sup>EdU<sup>+</sup> figures were found. Shown here is basis pontis. No NeuN<sup>+</sup>XdU<sup>+</sup> cells were observed in tegmentum either. Additional experiments involving BrdU/EdU treatment between P8.5-P16, P16.5-P24, P24.5-P32, P0 (single dose BrdU), or P4 (single dose BrdU), followed by 28-day chase period in each case, also yielded no NeuN<sup>+</sup>XdU<sup>+</sup> pons cells. Scale bar = 10  $\mu\text{m}$ . **(e)** CD1 wild-type mice were given BrdU in a single dose of 50 mg/kg 100 minutes prior to perfusion. **(f)** Pons tissue from mice prepared as in (e) was co-stained for BrdU, doublecortin (DCX), and polysialated neural cell adhesion molecule (PSA-NCAM). Shown here is basis pontis. No clear colocalization was observed between BrdU and either DCX or PSA-NCAM. Scale bar = 10  $\mu\text{m}$ . **(g)** CD1 wildtype mice received a four-day course of BrdU by intraperitoneal injections at 50mg/kg every 12 hours from P4.5 to P8, and were perfused 100 minutes following the last dose of BrdU. **(h)** Pons tissue from mice prepared as in (g) was stained for BrdU, Olig2, and APC; shown here is basis pontis. Scale bar = 10  $\mu\text{m}$ . **(i)** The proportion of OLPs (Olig2<sup>+</sup> APC<sup>-</sup> cells) that were BrdU<sup>+</sup> after the 4-day pulse was greater in basis pontis than in tegmentum ( $P = 0.0146$ , unpaired  $t$ -test), consistent with findings of denser proliferation among basis pontis OLPs (Fig. 7d) and greater fold expansion among basis pontis oligodendroglia (Fig. 4f).

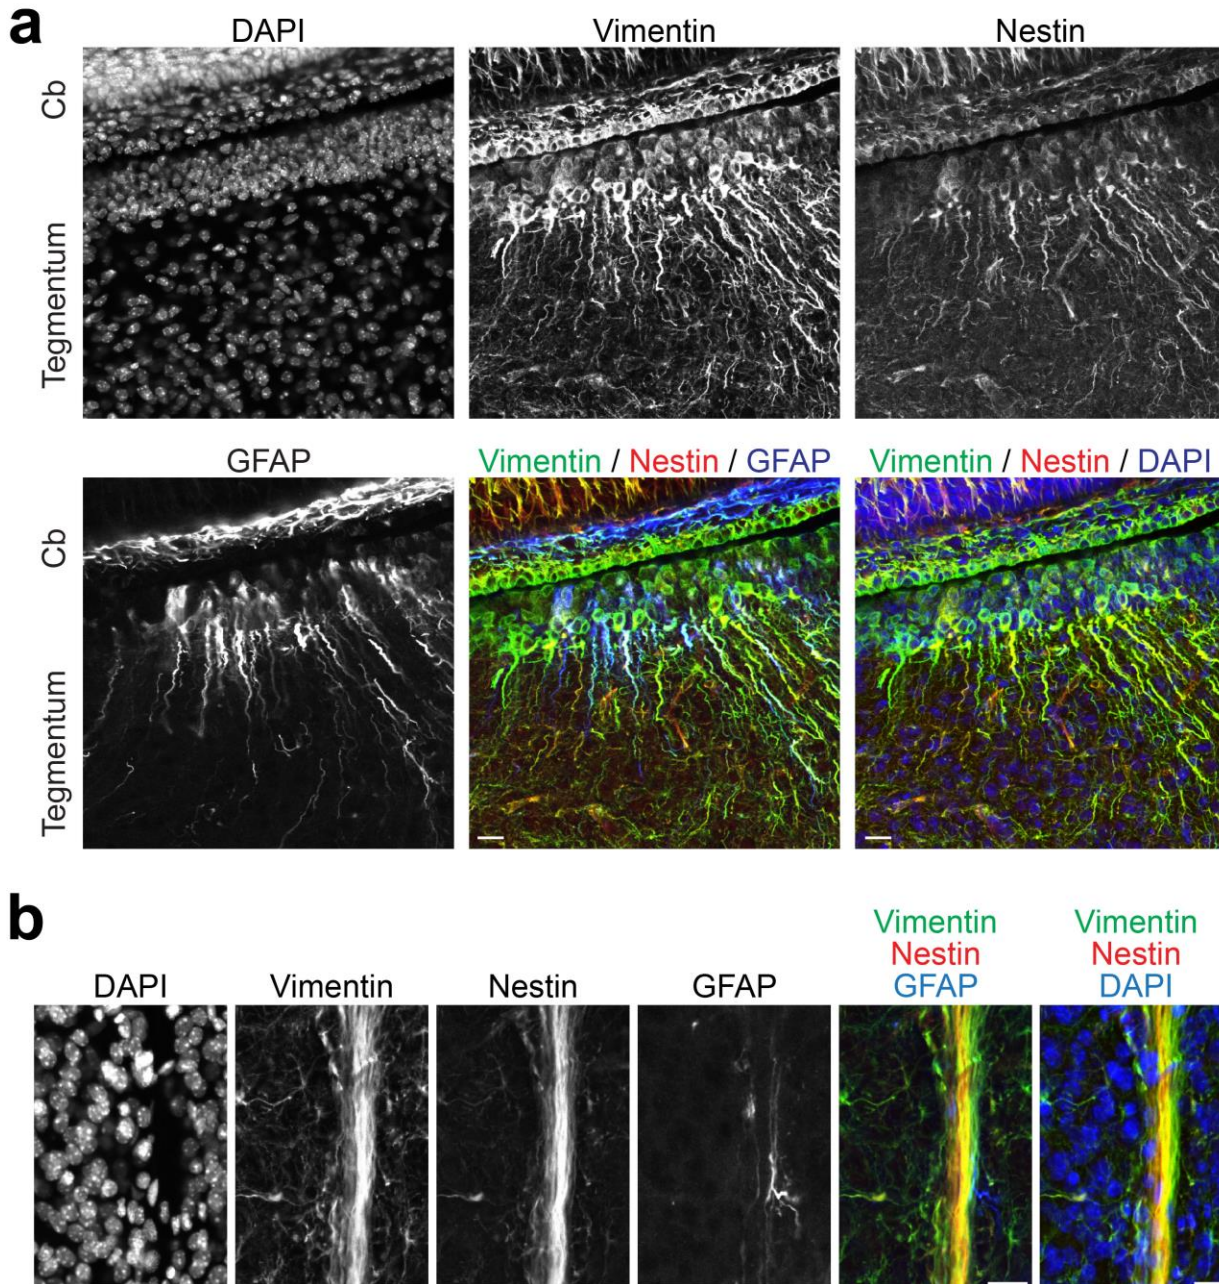

**Supplementary Figure 5. Expression of intermediate filaments along 4<sup>th</sup> ventricle and midline at P4.**

Sections of CD1 wildtype mouse pons tissue aged P4 were co-stained for vimentin, nestin, and GFAP, revealing partly overlapping expression patterns among the three intermediate filaments. **(a)** Radial glial fibers visible along the 4th ventricle, extending into tegmentum. Cb = Cerebellum. Scale bar = 20  $\mu$ m. **(b)** Vimentin and nestin are expressed intensely in the fibers of the midline, with adjacent GFAP<sup>+</sup> processes, and some filamentous Vimentin and Nestin staining within parenchyma. Scale bar = 20  $\mu$ m.



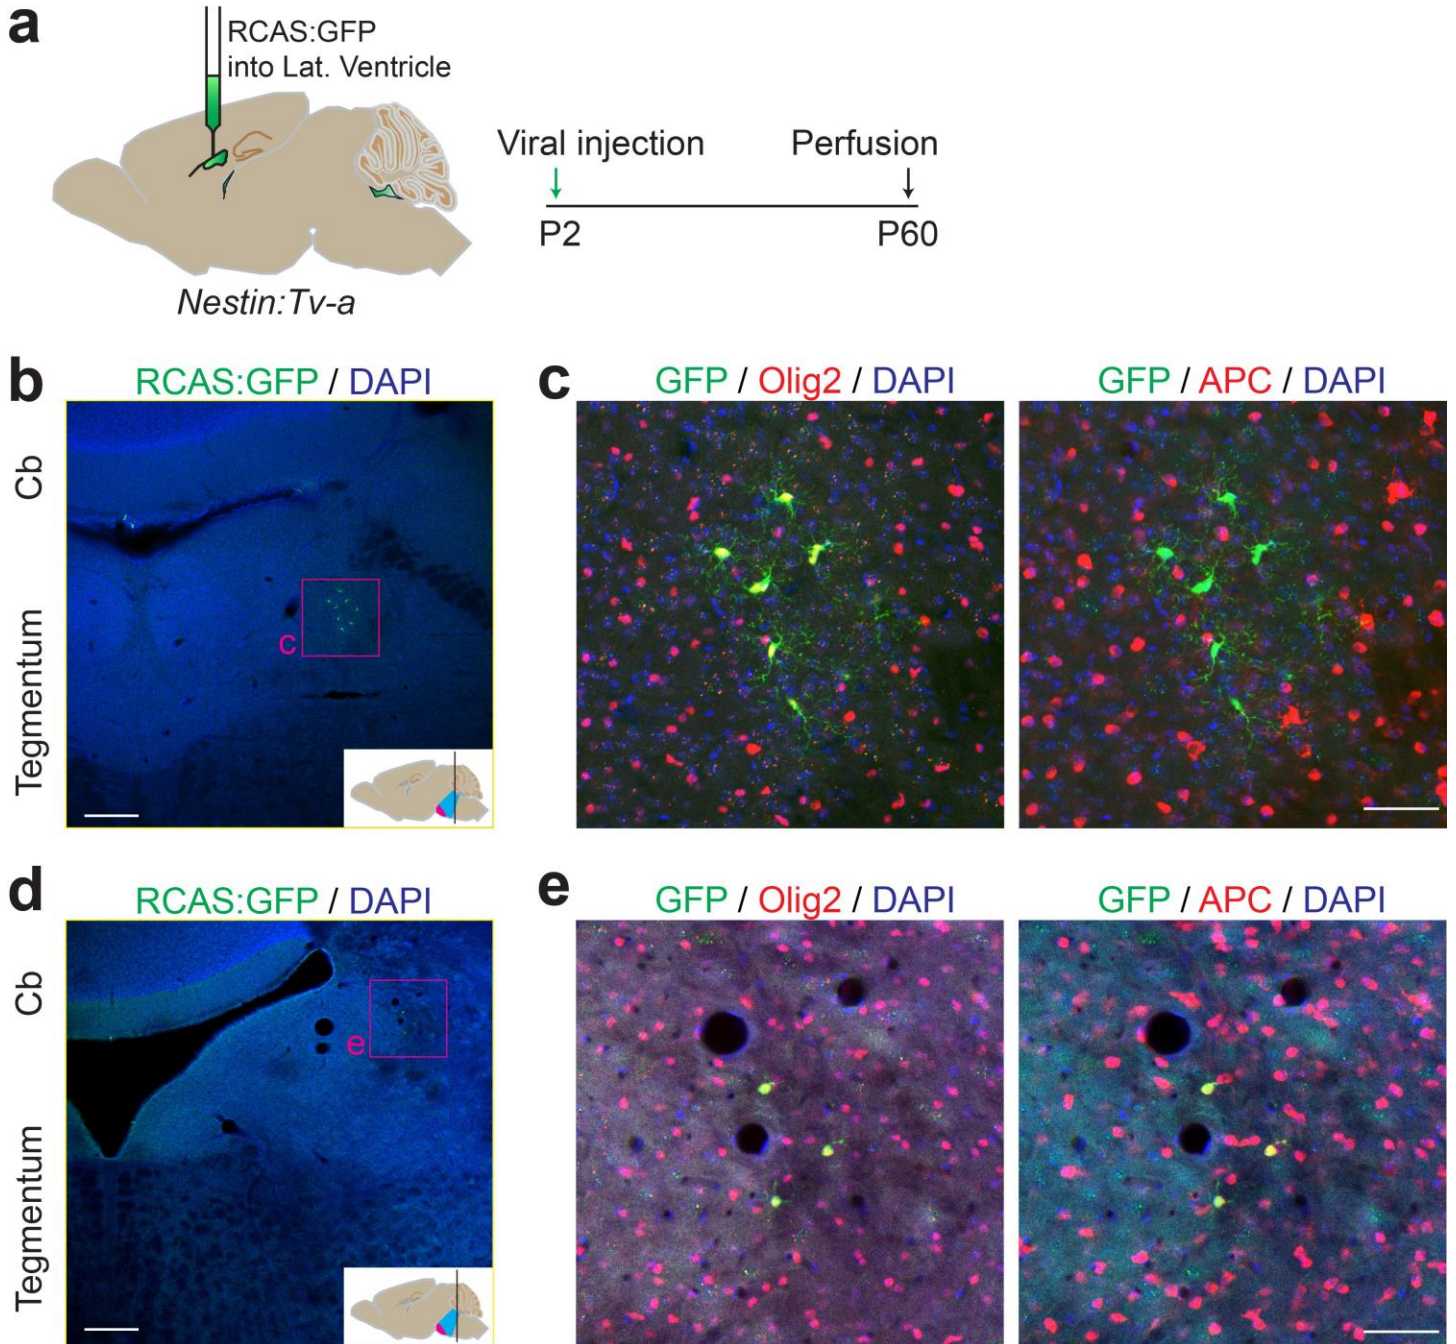

**Supplementary Figure 6. Retroviral lineage tracing from Nestin<sup>+</sup> VZ progenitors.**

**(a-e)** RCAS:GFP retrovirus injected into P2 lateral ventricle of *Nestin-tva* mice resulted in sparse clusters of GFP<sup>+</sup> cells in P60 pons parenchyma. **(b-c)** A cluster of GFP<sup>+</sup>Olig2<sup>+</sup>APC<sup>-</sup> cells, with OLP-like morphology, near locus ceruleus. **(d-e)** A cluster of round, Olig2<sup>+</sup>APC<sup>+</sup> cells in caudal pontine tegmentum, indicating mature pons OLs deriving from postnatal 4th ventricle progenitors. Cb = Cerebellum. Scale bars = 200 μm (b,d), 50 μm (c,e).

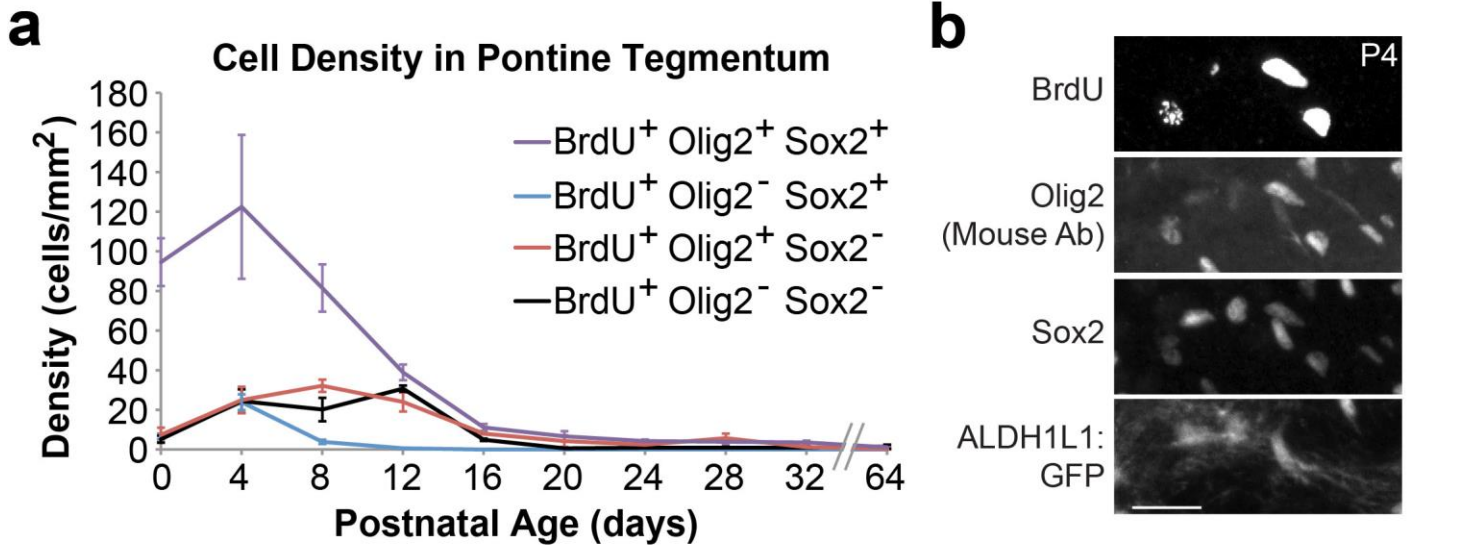

**c**

Cell density (cells / mm<sup>2</sup>)

| Age | Basis Pontis                       |                                                       | Pontine Tegmentum                  |                                                       |
|-----|------------------------------------|-------------------------------------------------------|------------------------------------|-------------------------------------------------------|
|     | BrdU <sup>+</sup> GFP <sup>+</sup> | Olig2 <sup>+</sup> BrdU <sup>+</sup> GFP <sup>+</sup> | BrdU <sup>+</sup> GFP <sup>+</sup> | Olig2 <sup>+</sup> BrdU <sup>+</sup> GFP <sup>+</sup> |
| P0  | 69.4 ± 7.9                         | 6.1 ± 3.7                                             | 22.6 ± 6.1                         | 13.7 ± 3.8                                            |
| P2  | 74.9 ± 8.0                         | 3.8 ± 2.4                                             | 27.1 ± 7.2                         | 8.3 ± 3.2                                             |
| P4  | 73.0 ± 3.9                         | 1.3 ± 0.9                                             | 12.4 ± 2.9                         | 3.2 ± 1.2                                             |
| P6  | 37.7 ± 1.2                         | 2.8 ± 1.1                                             | 6.6 ± 0.1                          | 0.6 ± 0.6                                             |
| P8  | 19.6 ± 2.3                         | 1.9 ± 1.0                                             | 1.0 ± 0.1                          | 0.4 ± 0.2                                             |
| P10 | 14.8 ± 3.2                         | 0 ± 0                                                 | 0.4 ± 0.2                          | 0.1 ± 0.1                                             |
| P12 | 2.9 ± 1.4                          | 0 ± 0                                                 | 0.3 ± 0.3                          | 0 ± 0                                                 |
| P16 | 0 ± 0                              | 0 ± 0                                                 | 0 ± 0                              | 0 ± 0                                                 |
| P20 | 0 ± 0                              | 0 ± 0                                                 | 0 ± 0                              | 0 ± 0                                                 |
| P64 | 0 ± 0                              | 0 ± 0                                                 | 0 ± 0                              | 0 ± 0                                                 |

**Supplementary Figure 7. Pontine Sox2<sup>+</sup> Olig2<sup>+</sup> BrdU<sup>+</sup> progenitors are predominantly not astrocytes.**

(a) Classification of BrdU<sup>+</sup> cells in pontine tegmentum (basis pontis shown in Fig. 8d) by Sox2 and Olig2 status. In pairwise comparisons between the Sox2<sup>+</sup>Olig2<sup>+</sup>BrdU<sup>+</sup> population and each other population, 3-factor ANOVAs based on cell type, region, and age revealed that the Sox2<sup>+</sup>Olig2<sup>+</sup>BrdU<sup>+</sup> population is the most abundant ( $F_{1,80} \geq 170.26$ ,  $P < 0.0003$ ). Comparing cell types pairwise within tegmentum, 2-factor ANOVAs based on cell type and age similarly showed the Sox2<sup>+</sup>Olig2<sup>+</sup>BrdU<sup>+</sup> population to be greater than any other population in tegmentum ( $F_{1,40} \geq 38.07$ ,  $P < 0.0003$ ). P values include Bonferroni post-hoc adjustment. (b) Representative field of P4 ALDH1L1:GFP mouse pons stained for GFP, BrdU, Sox2, and a different Olig2 antibody from that used in Figure 8g, confirming that Olig2 is commonly expressed in BrdU<sup>+</sup>Sox2<sup>+</sup>ALDH1L1:GFP<sup>-</sup> cells. Scale bar = 20  $\mu$ m. (c) Proliferation density of Olig2<sup>+</sup>ALDH1L1:GFP+BrdU+ cells through postnatal development, listed here numerically because counts were barely visible in graph of Figure 8i, indicating that astrocytes do not account for the Sox2<sup>+</sup>Olig2<sup>+</sup>BrdU<sup>+</sup> population observed in wild type mice (see (a) above and Fig. 8i). Furthermore, the Olig2<sup>+</sup> subpopulation is a small proportion of total ALDH1L1:GFP<sup>+</sup>BrdU<sup>+</sup> cells, except in P0 tegmentum.



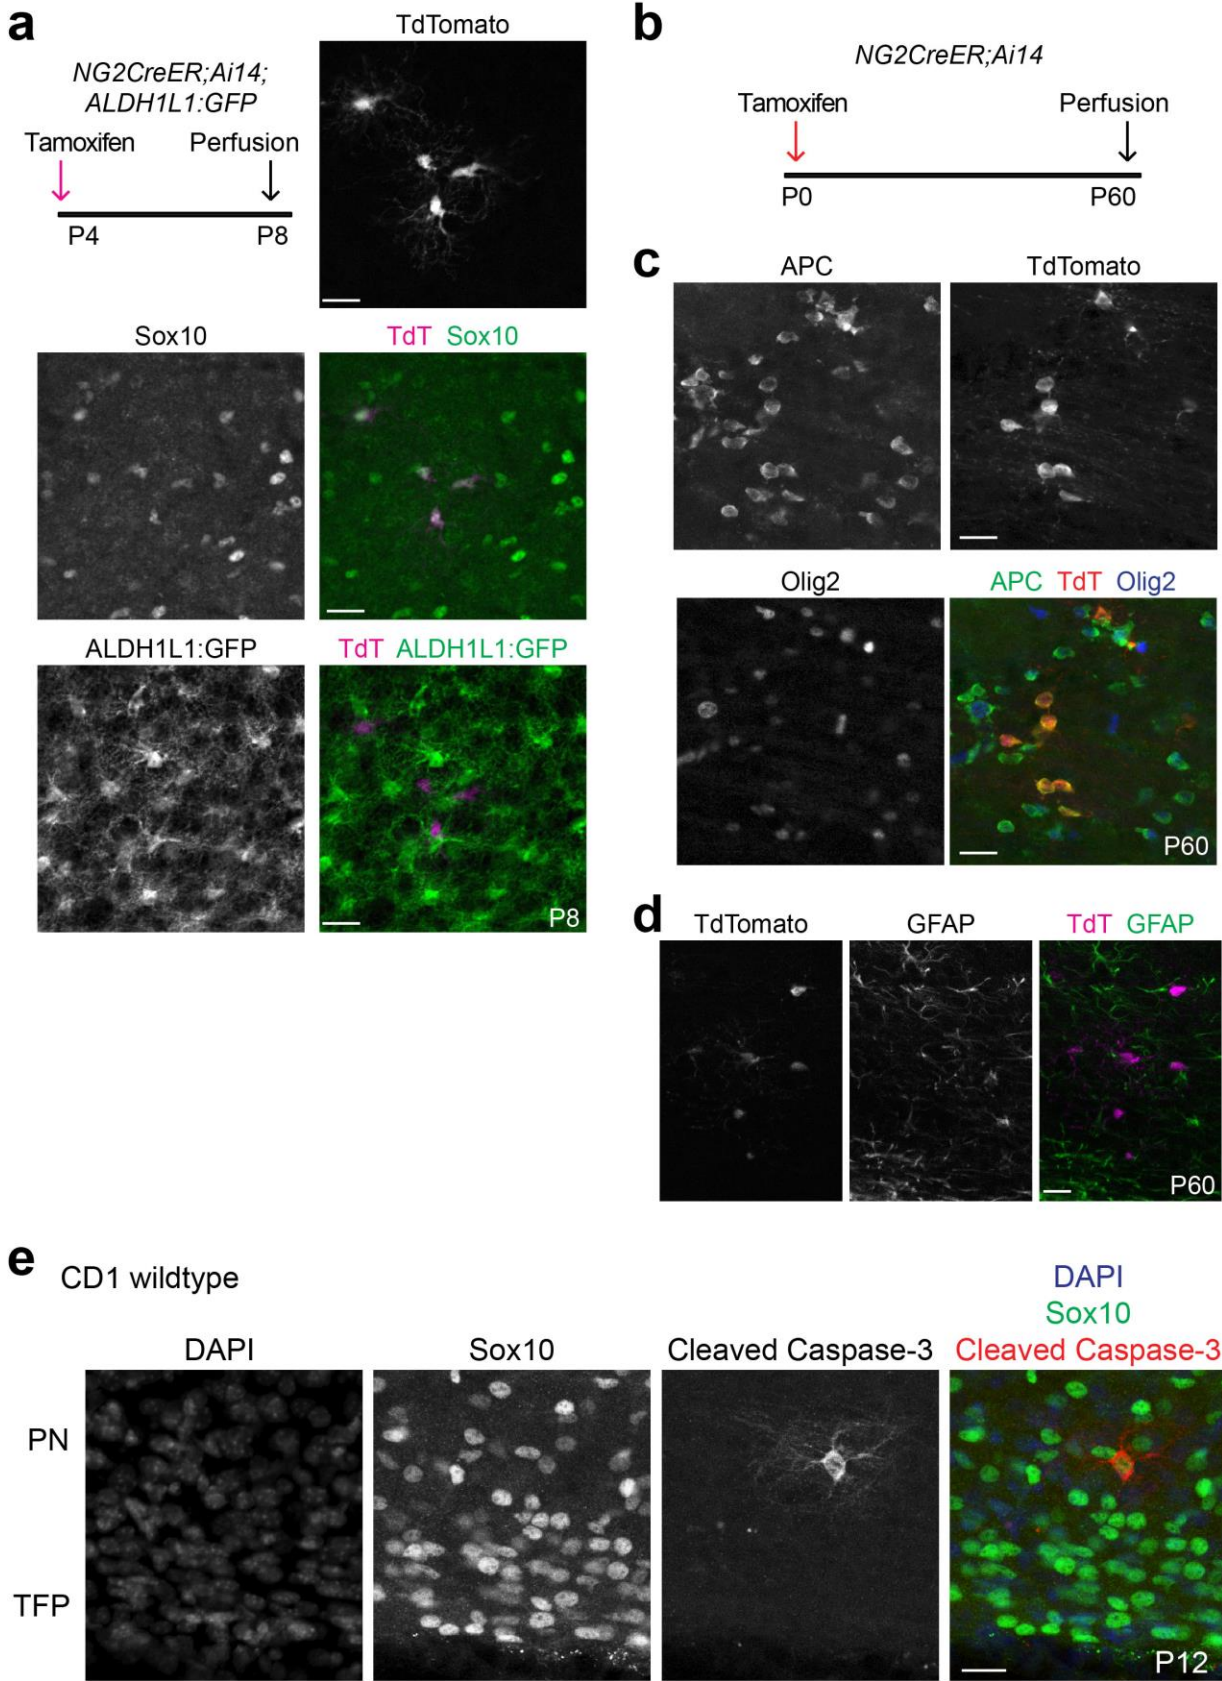

**Supplementary Figure 8. Lineage restriction and cell death of pontine oligodendroglia.**

**(a)** *NG2CreER;Ai14;ALDH1L1:GFP* mice received tamoxifen at P4 and perfusion at P8, revealing TdTomato expression in Sox10<sup>+</sup> oligodendroglia but not in ALDH1L1:GFP<sup>+</sup> astrocytes. Similar results were obtained with tamoxifen at P0. **(b-d)** Long-term fate-mapping of *NG2CreER;Ai14* mice: Animals received tamoxifen at P0 and were perfused at P60. **(c)** A cluster of TdTomato<sup>+</sup>Olig2<sup>+</sup>APC<sup>+</sup> OLs labeled in P60 *NG2CreER;Ai14* mice after tamoxifen at P0. **(d)** TdTomato does not colocalize

with fibers of GFAP<sup>+</sup> astrocytes in P60 *NG2CreER;Ai14* mice after tamoxifen at P0. **(e)** Apoptotic oligodendrocyte in postnatal mouse pons. CD1 wildtype mouse pons tissue aged P12 was co-stained for cleaved caspase-3 and Sox10. Note the complex, multipolar morphology of cleaved caspase-3 surrounding a Sox10<sup>+</sup> nucleus. TFP = transversus fasciculus pontis, PN = pontine nuclei. All images shown are from basis pontis. All scale bars are 20  $\mu$ m.

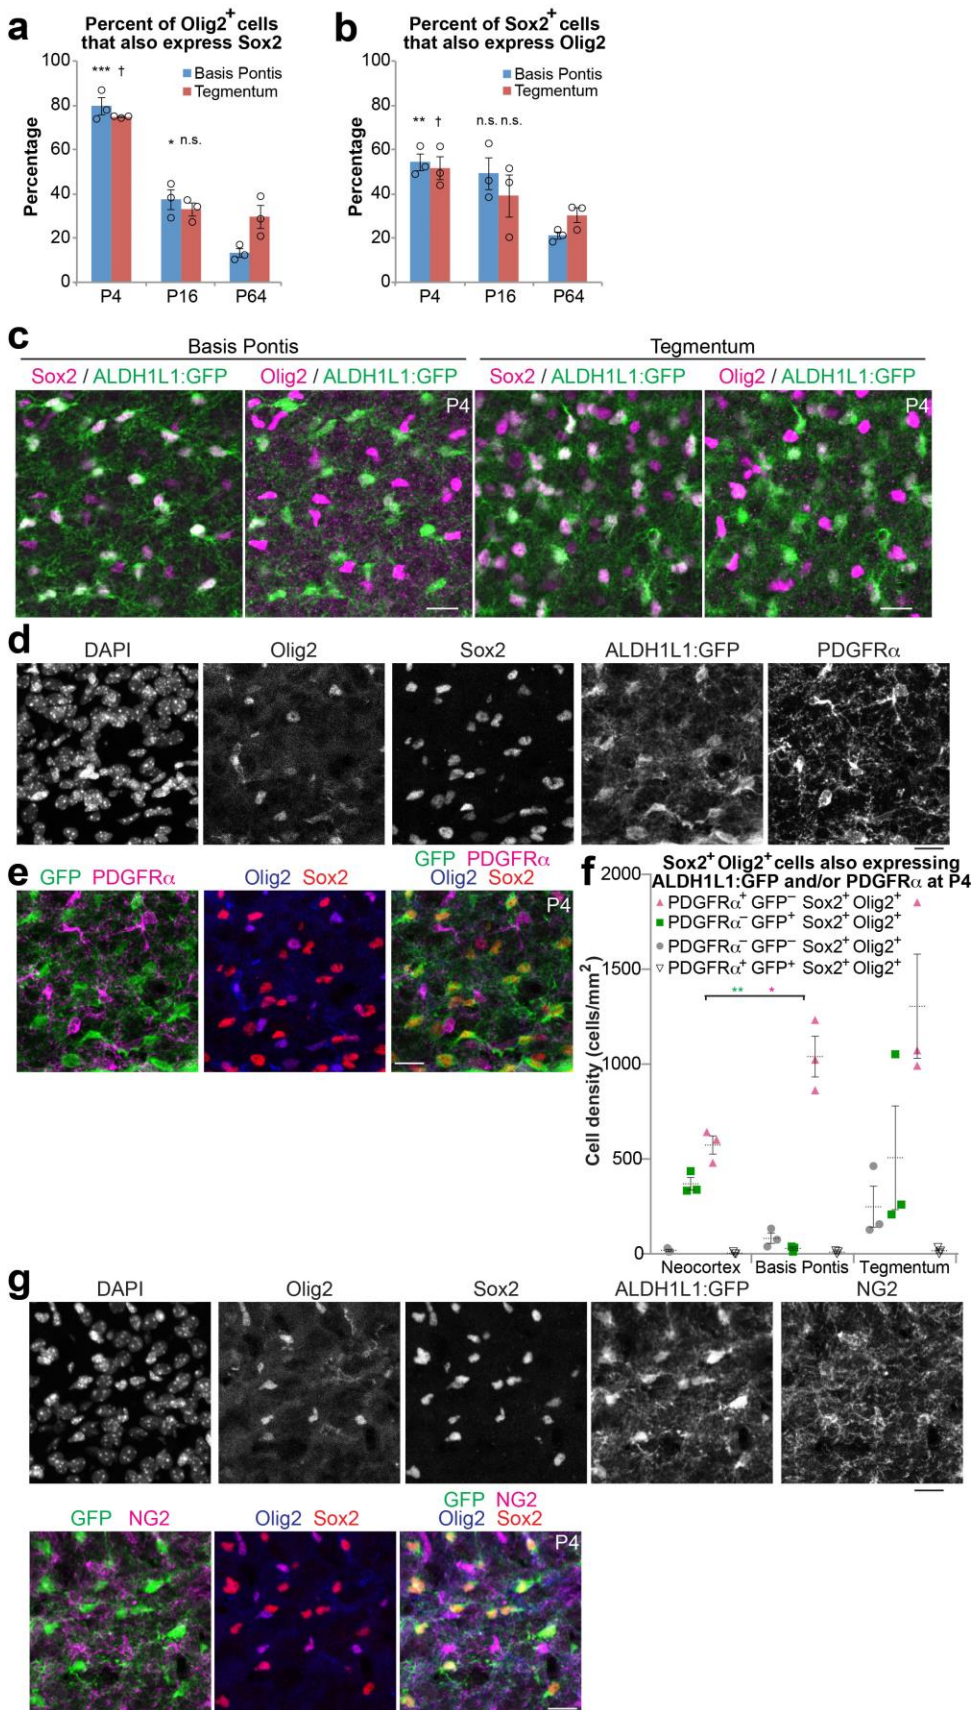

**Supplementary Figure 9. Pontine Sox2<sup>+</sup> Olig2<sup>+</sup> progenitors predominantly express markers of OLPs.**

(a-b) Sox2<sup>+</sup>Olig2<sup>+</sup> double-positive cells constitute a notable percentage of Olig2 cells (a) and Sox2 cells (b) in wildtype mouse pons, particularly in early postnatal life. n = 3 mice per cohort; mean  $\pm$  SEM; unpaired *t*-test vs. P64 basis pontis: \* *P* < 0.05, \*\* *P* < 0.01, \*\*\* *P* < 0.001; student's *t*-test vs. P64 tegmentum: † *P* < 0.05. (c) Representative fields from P4 ALDH1L1:GFP pons regions co-stained for Sox2, Olig2, and the astrocyte-specific ALDH1L1:GFP reporter, revealing expression of Sox2 in many GFP<sup>+</sup> cells, and expression of Olig2 in a subset of GFP<sup>+</sup> cells (tegmentum > basis pontis). (d)



Representative field from P4 *ALDH1L1:GFP* basis pontis co-stained for Sox2, Olig2, GFP (marking astrocytes), and PDGFR $\alpha$  (marking OLPs). **(e)** Merges of single channels from (d) show that Olig2<sup>+</sup>Sox2<sup>+</sup> cells in basis pontis generally colocalize with PDGFR $\alpha$  rather than ALDH1L1:GFP. **(f)** Classification of Sox2<sup>+</sup>Olig2<sup>+</sup> cells in P4 *ALDH1L1:GFP* brain regions by GFP and PDGFR $\alpha$  status. Shown is the density of each type of Sox2<sup>+</sup>Olig2<sup>+</sup> cell. Sox2<sup>+</sup>Olig2<sup>+</sup>PDGFR $\alpha$ <sup>+</sup> OLPs are denser in basis pontis than in neocortex (unpaired *t*-test, *P* = 0.0331), and account for ~90% of basis pontis Sox2<sup>+</sup>Olig2<sup>+</sup> cells. Graph shows individual replicates with mean  $\pm$  SEM of *n* = 3 mice; unpaired *t*-test, \* *P* < 0.05, \*\* *P* < 0.01; colors of asterisks indicate cell population being compared. **(g)** Representative field from P4 *ALDH1L1:GFP* basis pontis co-stained for Sox2, Olig2, GFP (marking astrocytes), and NG2 protein (marking OLPs); Olig2<sup>+</sup>Sox2<sup>+</sup> cells in basis pontis generally colocalize with NG2 rather than ALDH1L1:GFP. All scale bars = 20  $\mu$ m.

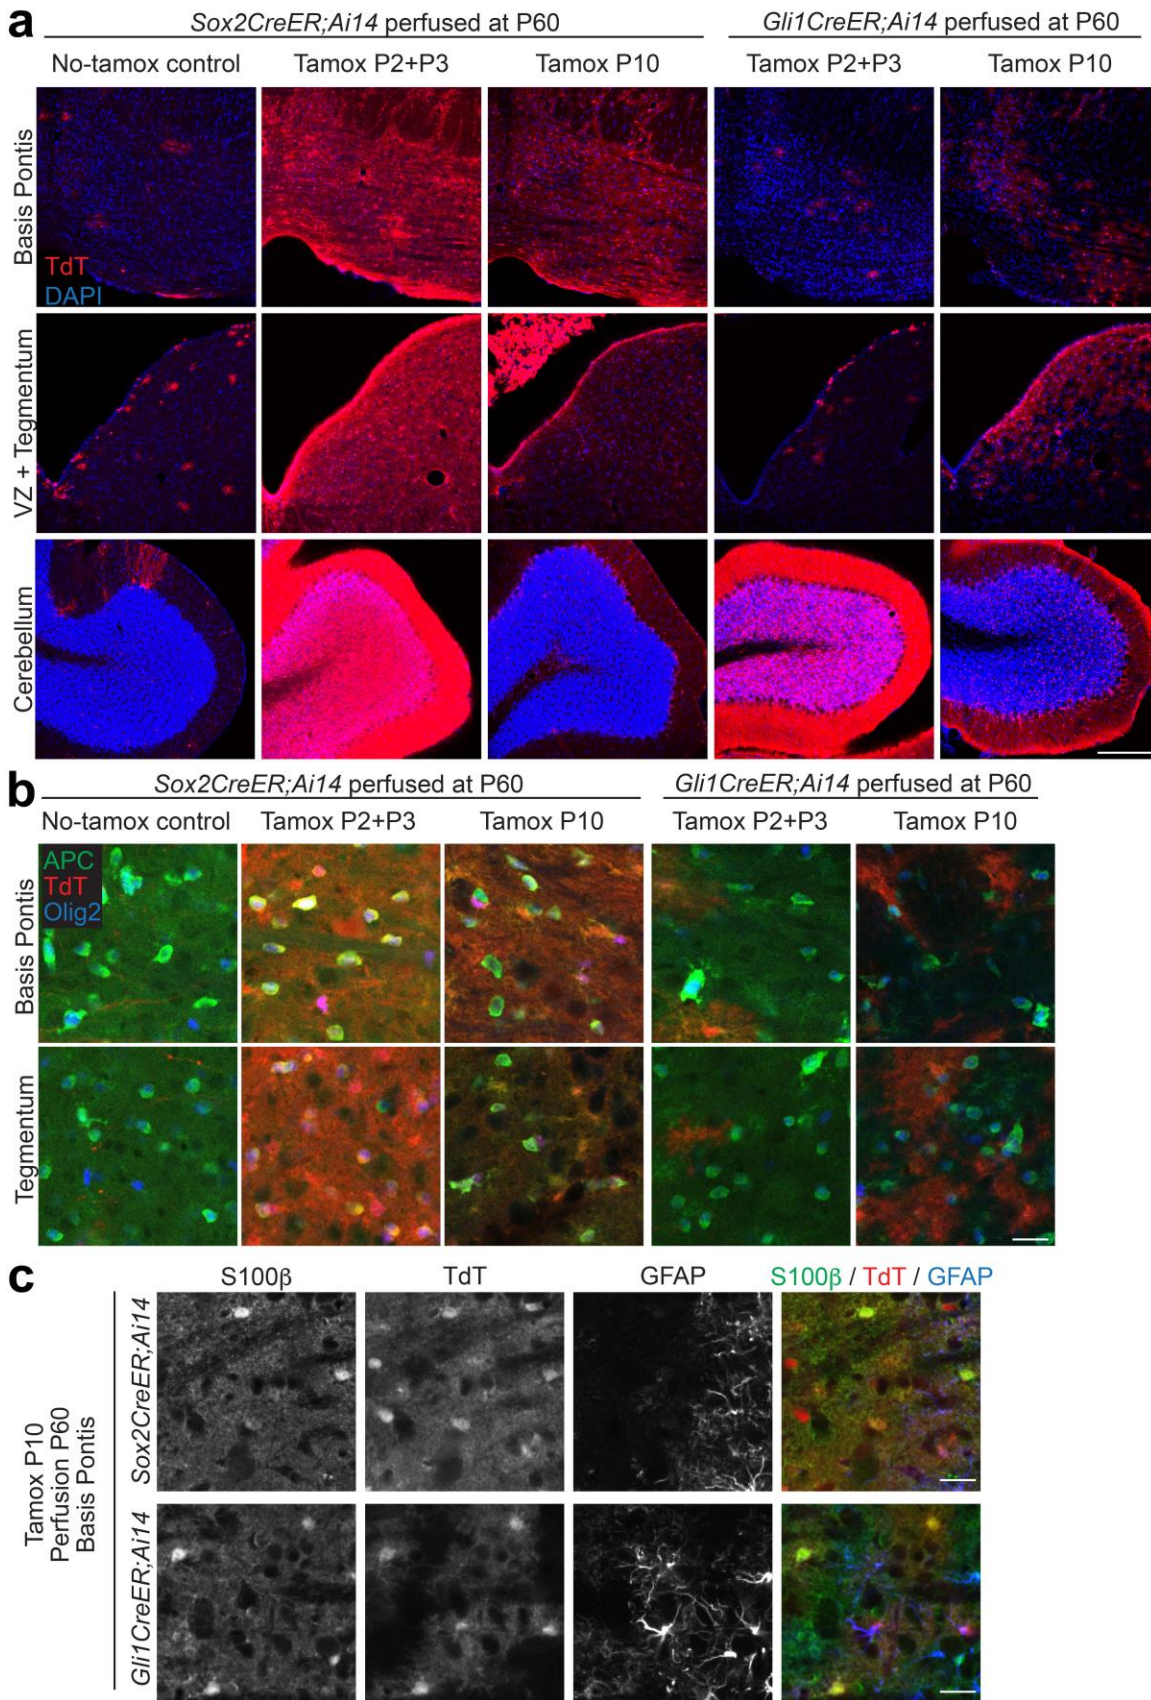

**Supplementary Figure 10. Comparison of adult pons labeling by postnatal *Sox2CreER* and *Gli1CreER* recombination.**

*Sox2CreER;Ai14* mice or *Gli1CreER;Ai14* mice were given tamoxifen at the indicated ages and perfused at P60. Hindbrain sections were prepared and stained for TdTomato to reveal extent of adult tissue derived from postnatal *Sox2*<sup>+</sup> or *Gli1*<sup>+</sup> progenitors. **(a)** Both reporters showed extensive TdT expression in the cerebellar granule layer, as expected, with broader labeling at P2+P3 than at P10. *Sox2CreER* produced broad labeling throughout pons parenchyma, with

more at P2+P3 than at P10, while *Gli1CreER* produced sparse parenchymal labeling, and more at P10 than at P2+P3. A low rate of spontaneous recombination, producing sparse clones of cells, was observed in no-tamoxifen control *Sox2CreER;Ai14* mice. *Gli1CreER;Ai14* no-tamoxifen control mice showed no background recombination (not shown). Scale bar = 200  $\mu\text{m}$ . **(b)** Higher-magnification view of pons parenchyma, stained for TdT (red), APC (green), and Olig2 (blue). TdT<sup>+</sup>APC<sup>+</sup>Olig2<sup>+</sup> cells were observed in *Sox2CreER;Ai14* pons, but not in *Gli1CreER;Ai14* pons. Scale bar = 20  $\mu\text{m}$ . **(c)** Mice of the indicated genotypes received tamoxifen at P10 and were perfused at P60; pons sections were stained for TdT (red) and the astrocyte markers S100 $\beta$  (green) and GFAP (blue). Scale bar = 20  $\mu\text{m}$ .
